# Supplementary material for: BMPR2 expression level is correlated with low immune infiltration and predicts metastasis and poor survival in osteosarcoma
Source: PubMed Central journal article supplement — Oncol Lett. 2021 Mar 18;21(5):391. doi: 10.3892/ol.2021.12652 (PMC7988701; doi:10.3892/ol.2021.12652), 2021-03-18

Figure S1. Gene Set Enrichment Analysis results summary. Pathways that were positively correlated with high BMPR2 expression (false discovery rate <0.25, nominal P<0.05) are shown. BMPR2, bone morphogenetic protein receptor 2.

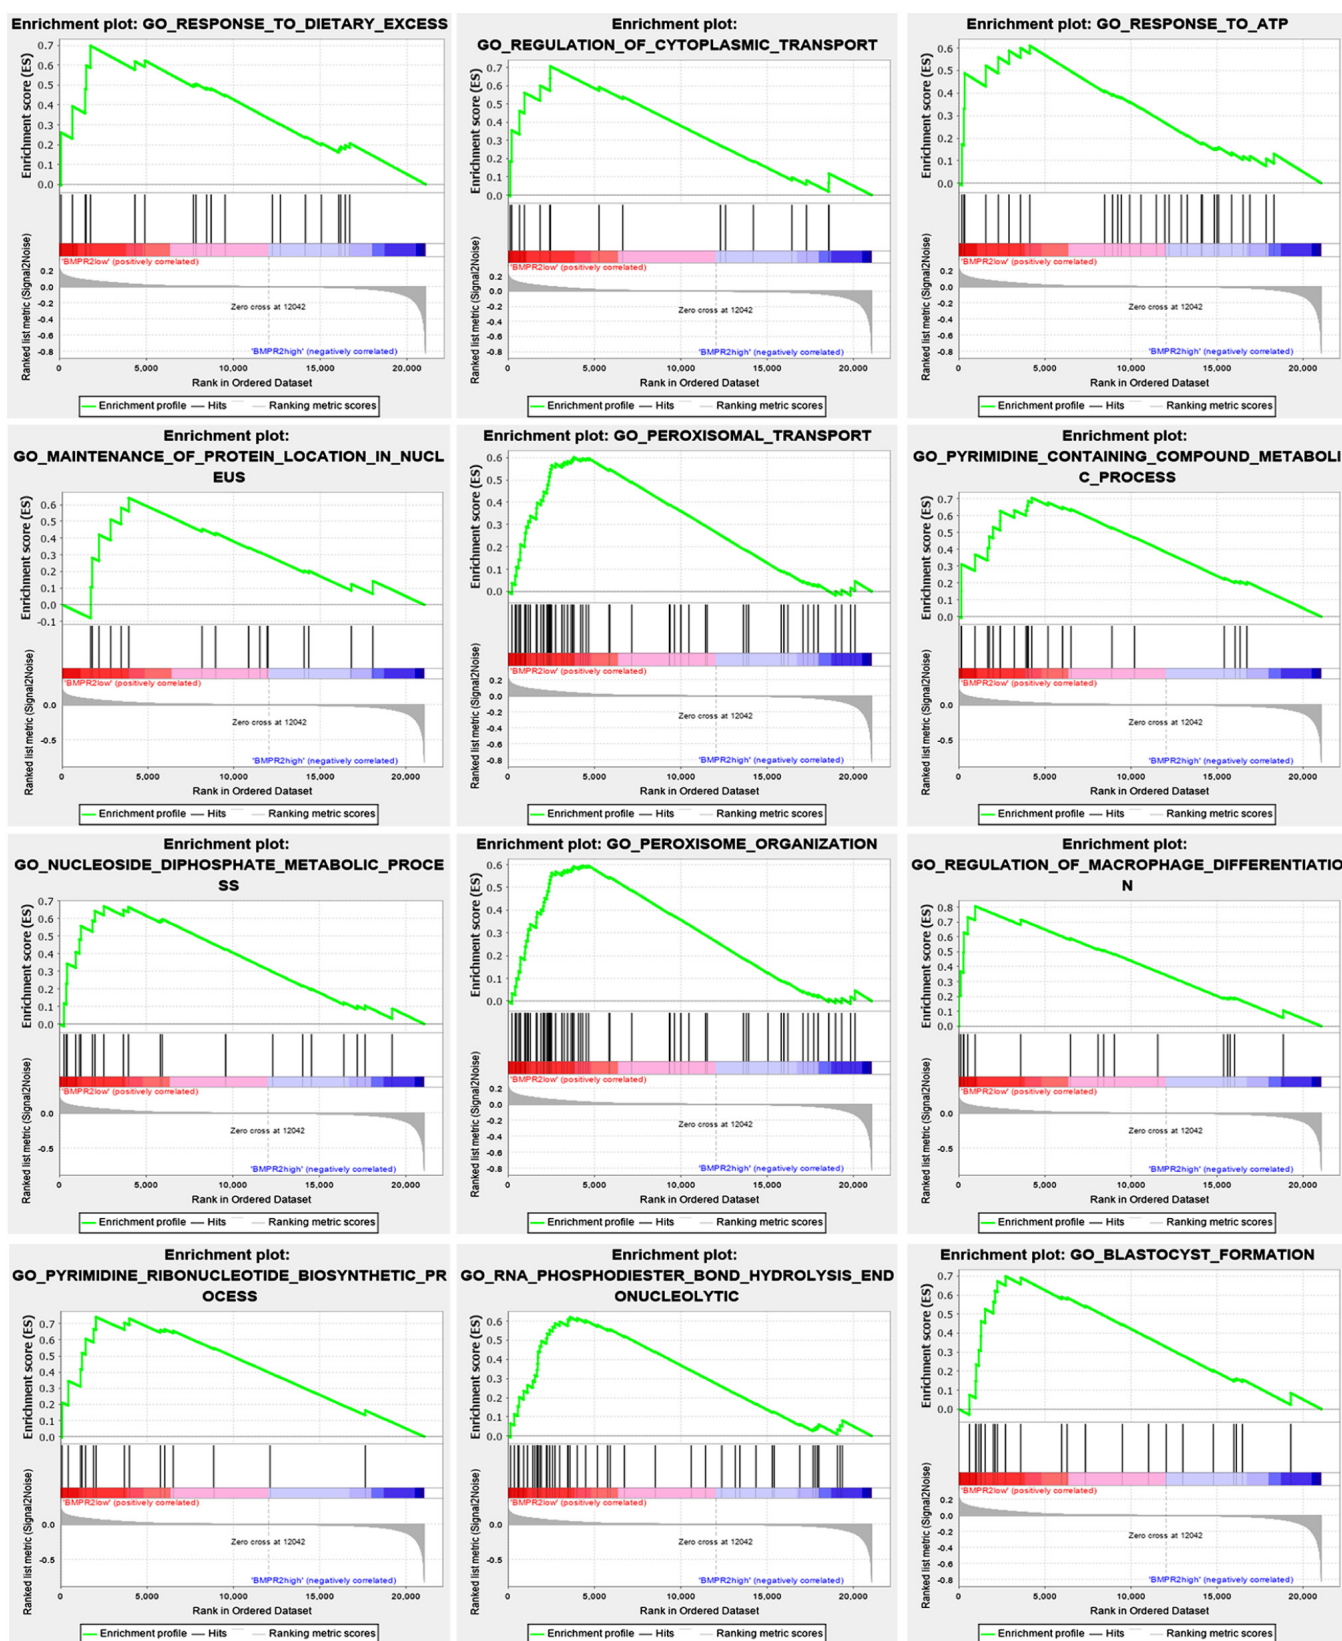

Figure S2. Continued.

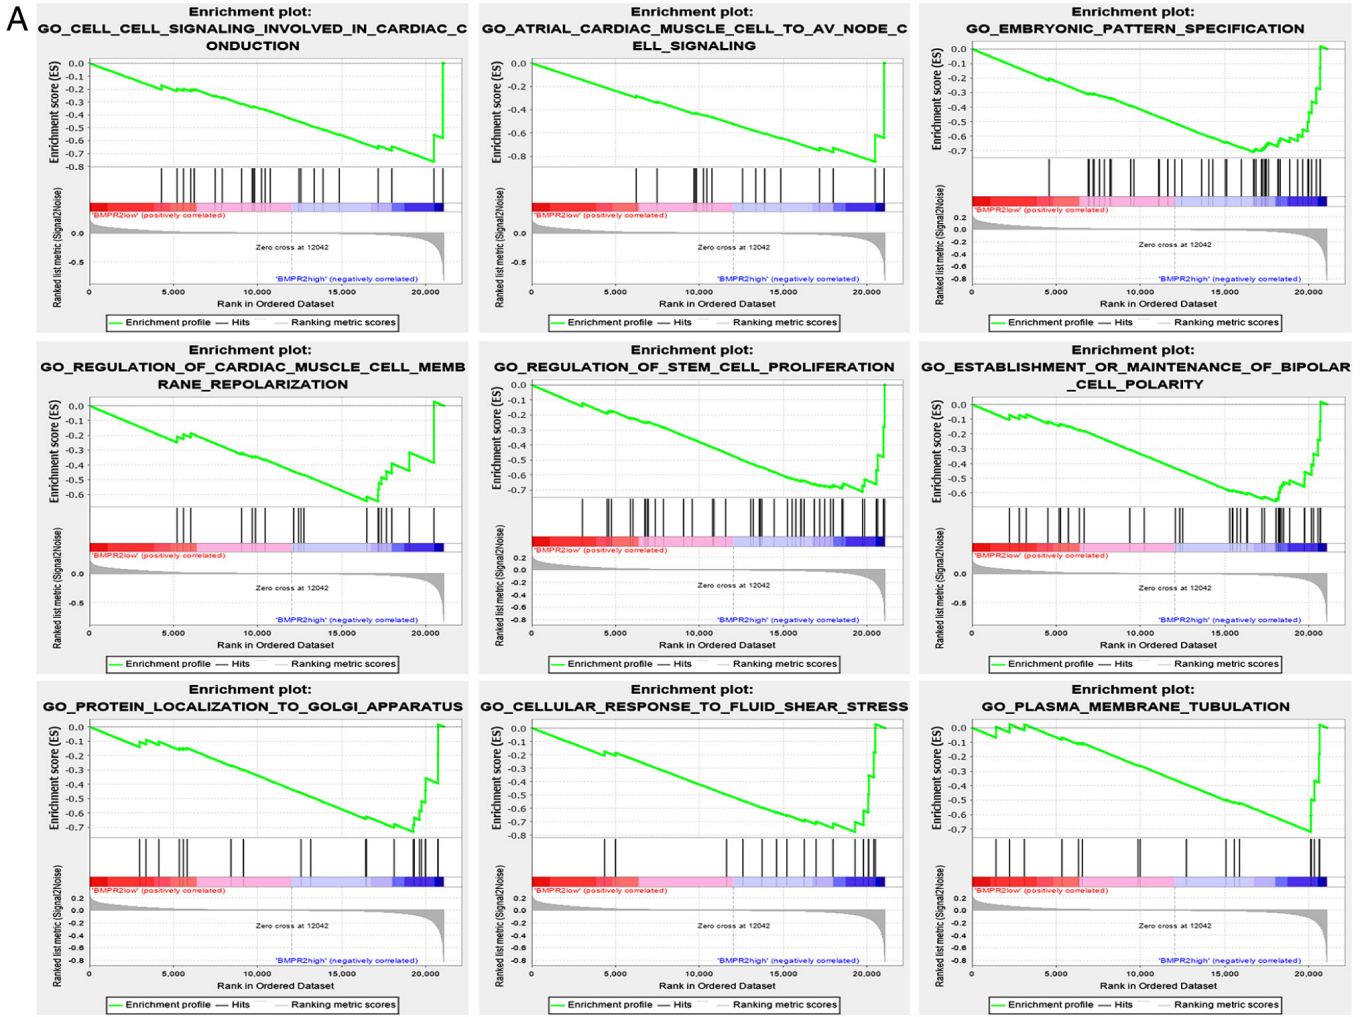

Figure S2. GSEA results summary. (A and B) Pathways negatively correlated with high BMPR2 expression (false discovery rate <0.25, nominal P<0.05) are shown. BMPR2, bone morphogenetic protein receptor 2.

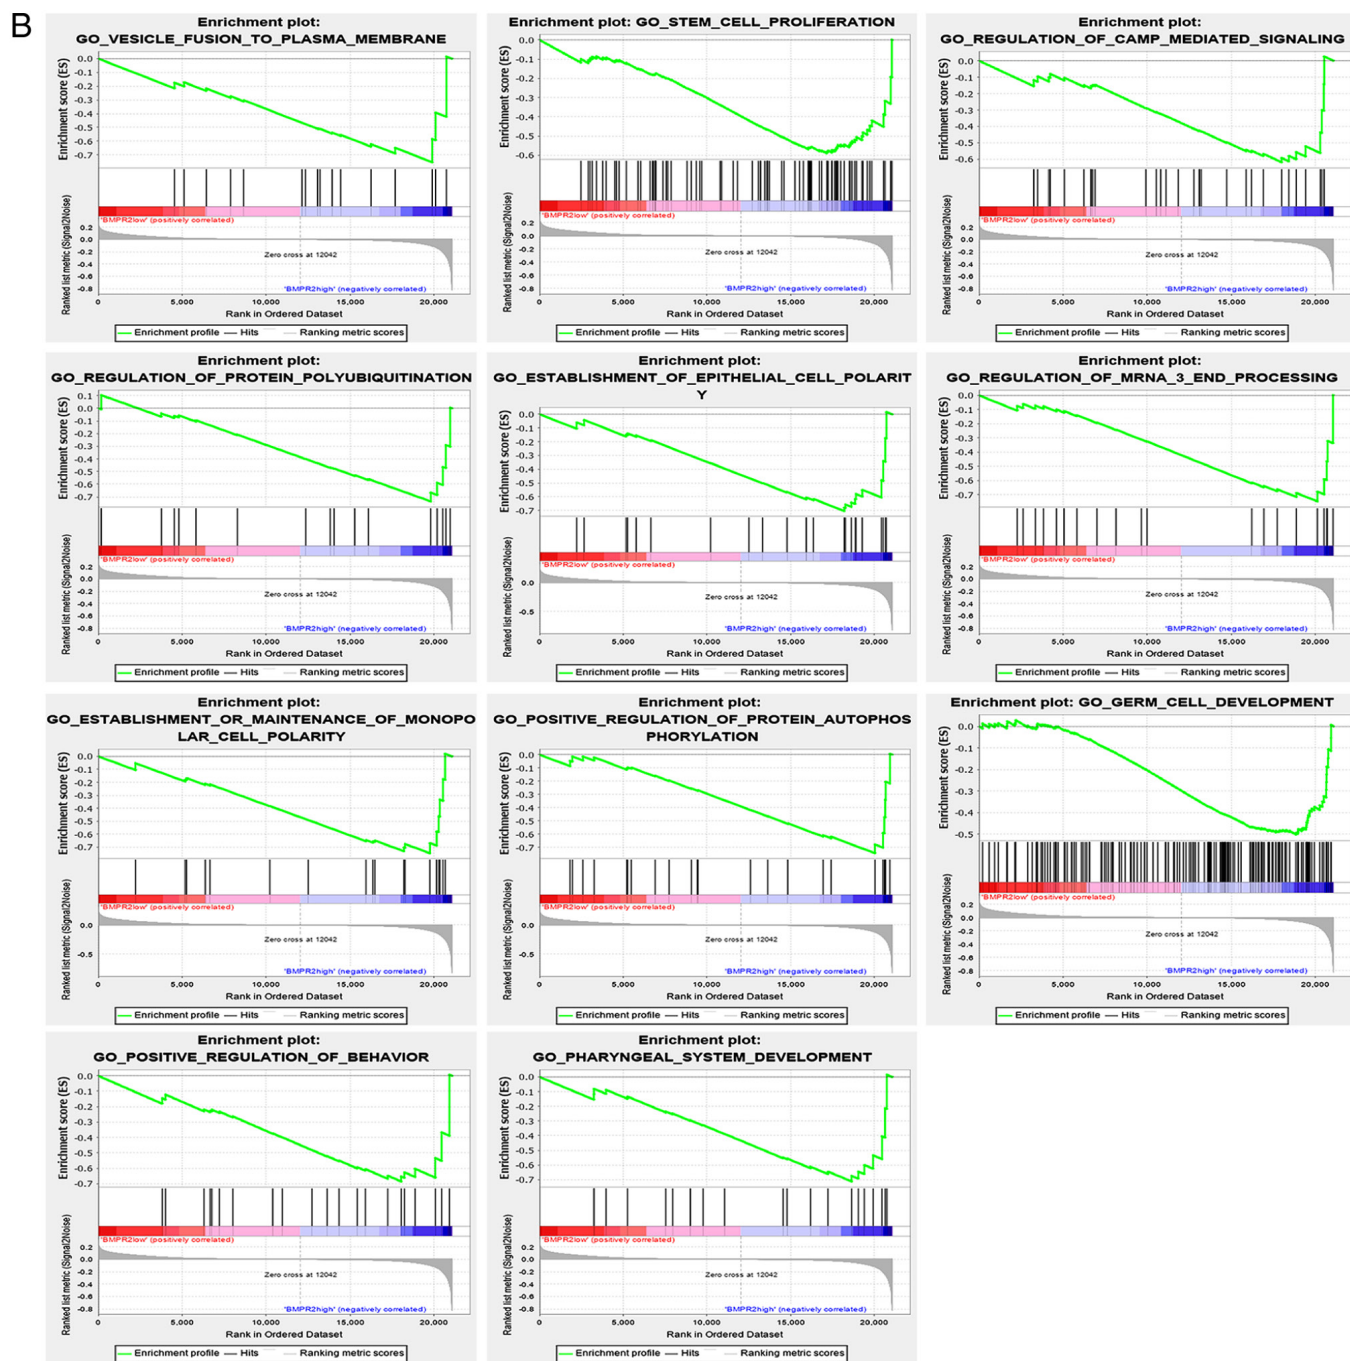

Figure S3. Relationships between BMPR2 expression and immune marker genes of different immune cells in sarcoma in the Tumor Immune Estimation Resource database, including T cells (general), Tregs, B cells, TAMs, M1 macrophages, Th2 and Th17 cells. BMPR2, bone morphogenetic protein receptor 2; Treg, regulatory T cell; TAM, tumor-associated macrophage; h, helper; RSEM, RNA-Seq by Expectation-Maximization.

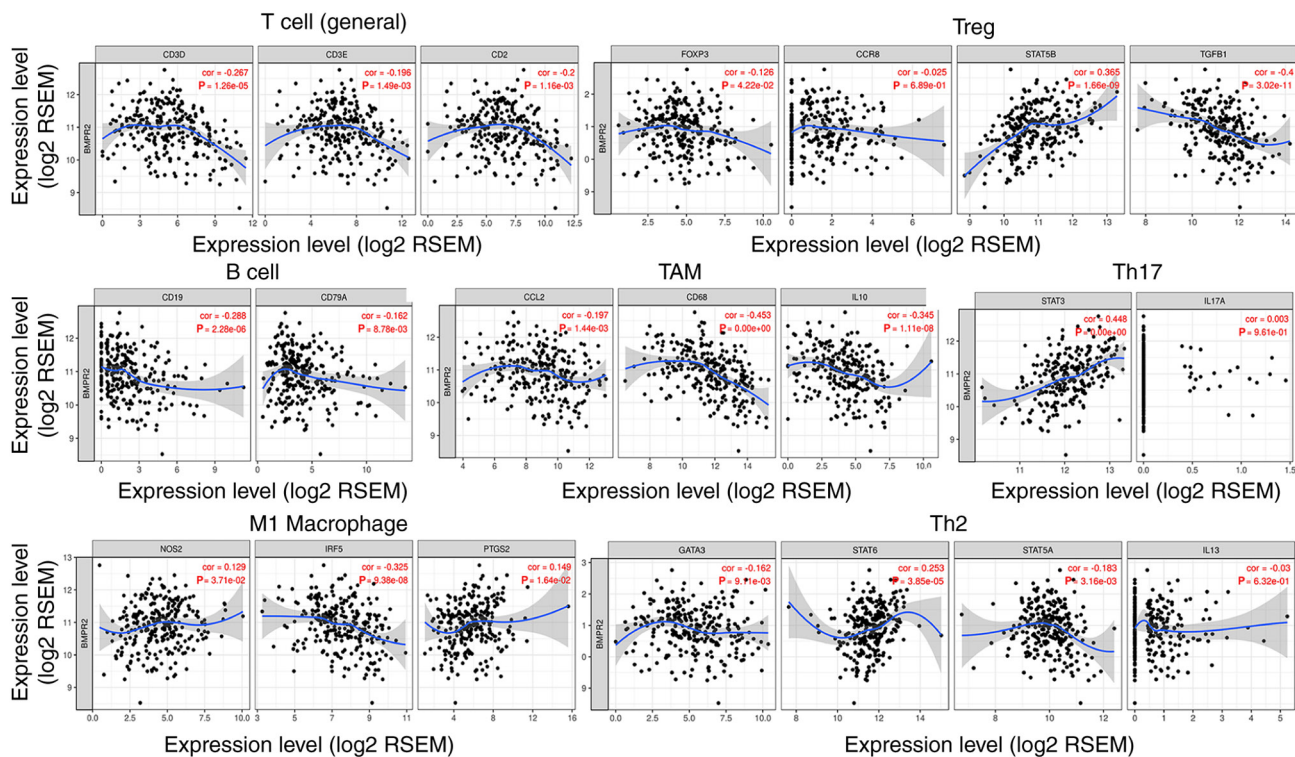

Figure S4. Relationships between BMPR2 expression and immune marker genes of different immune cells in sarcoma in the Tumor Immune Estimation Resource database, including natural killer and dendritic cells, Th1, Tfh and exhausted T cells. BMPR2, bone morphogenetic protein receptor 2; h, helper; f, follicular.

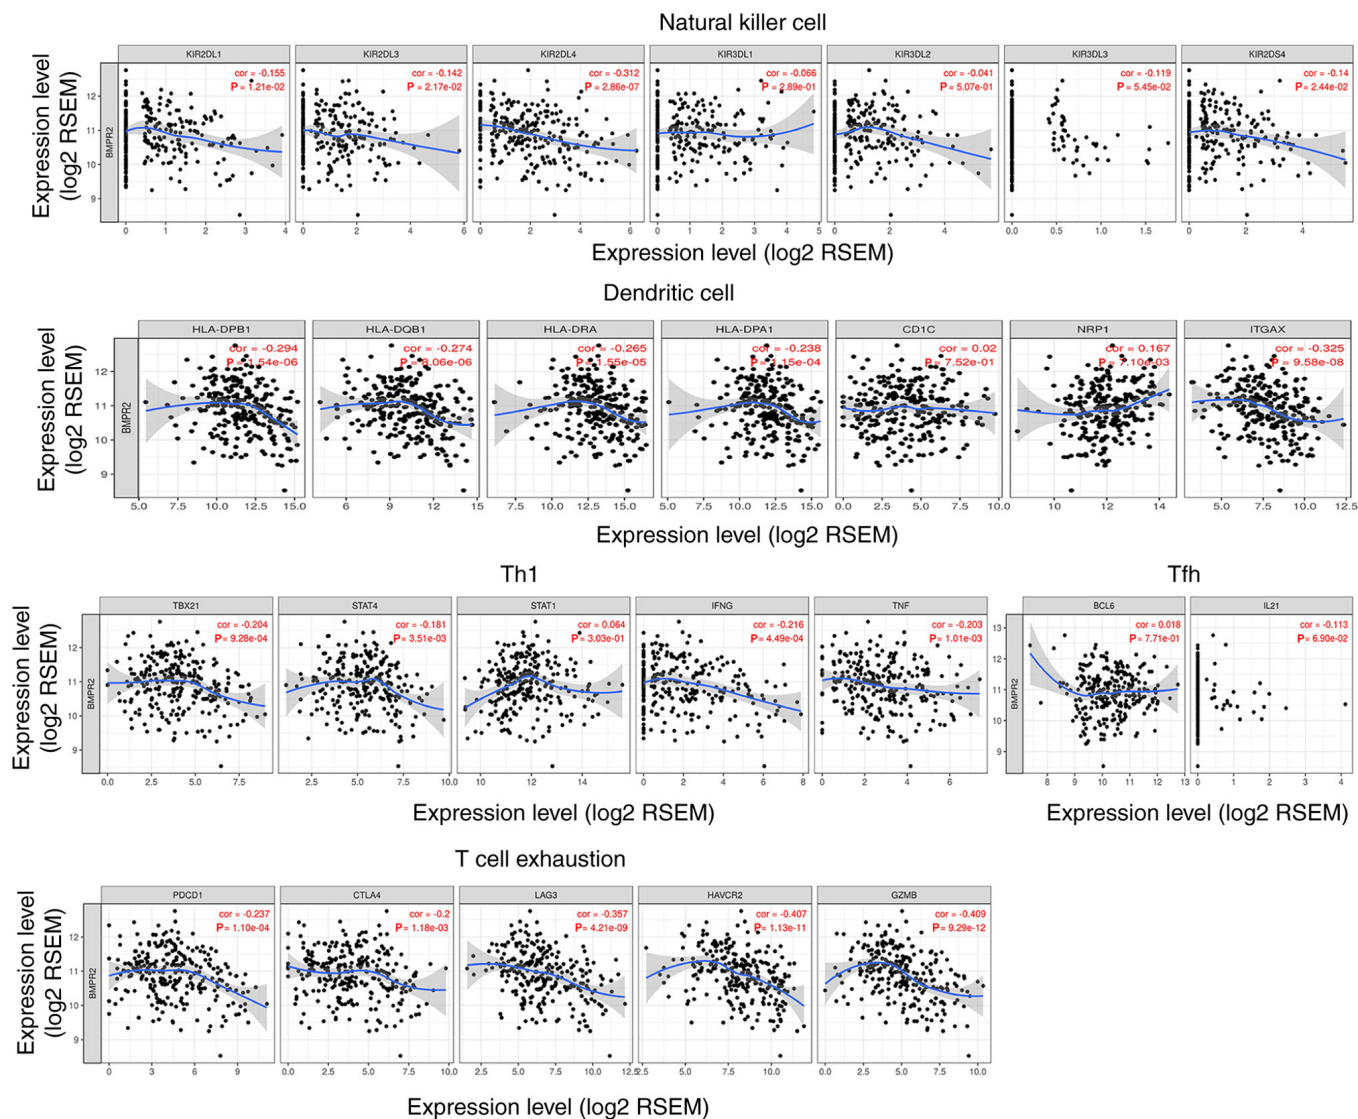

Figure S5. Relationships between the expression level of BMPR2 and marker genes of different immune cells (T cell (general), B cell, monocyte, TAM, M1 macrophage, neutrophils, natural killer cell and dendritic cell) in osteosarcoma from the R2 database. BMPR2, bone morphogenetic protein receptor 2; TAM, tumor-associated macrophage.

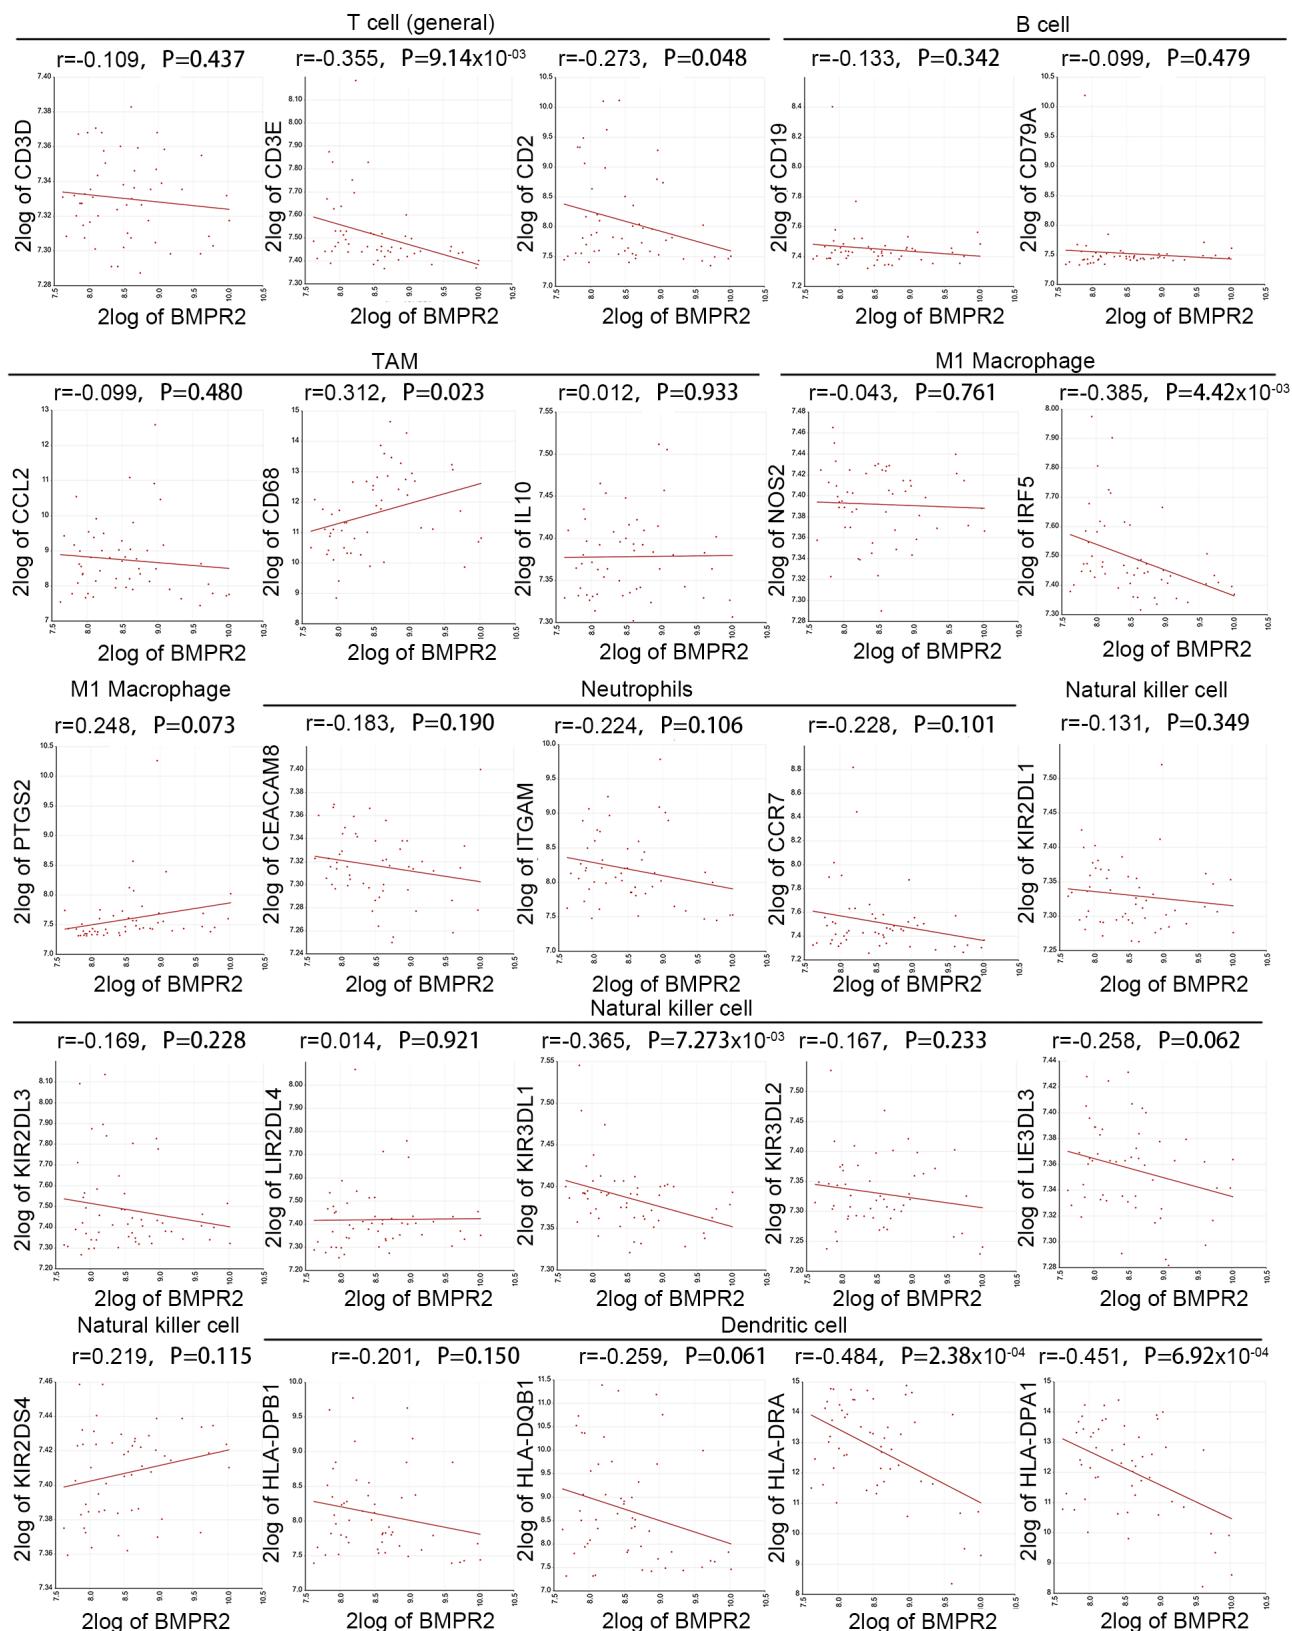

Figure S6. Associations between the expression level of BMPR2 and markers of different immune cells, including dendritic cells, Th1, Th2, Th17, Tregs, Tfh and exhausted T cells, in osteosarcoma from the R2 database. BMPR2, bone morphogenetic protein receptor 2; h, helper; f, follicular.

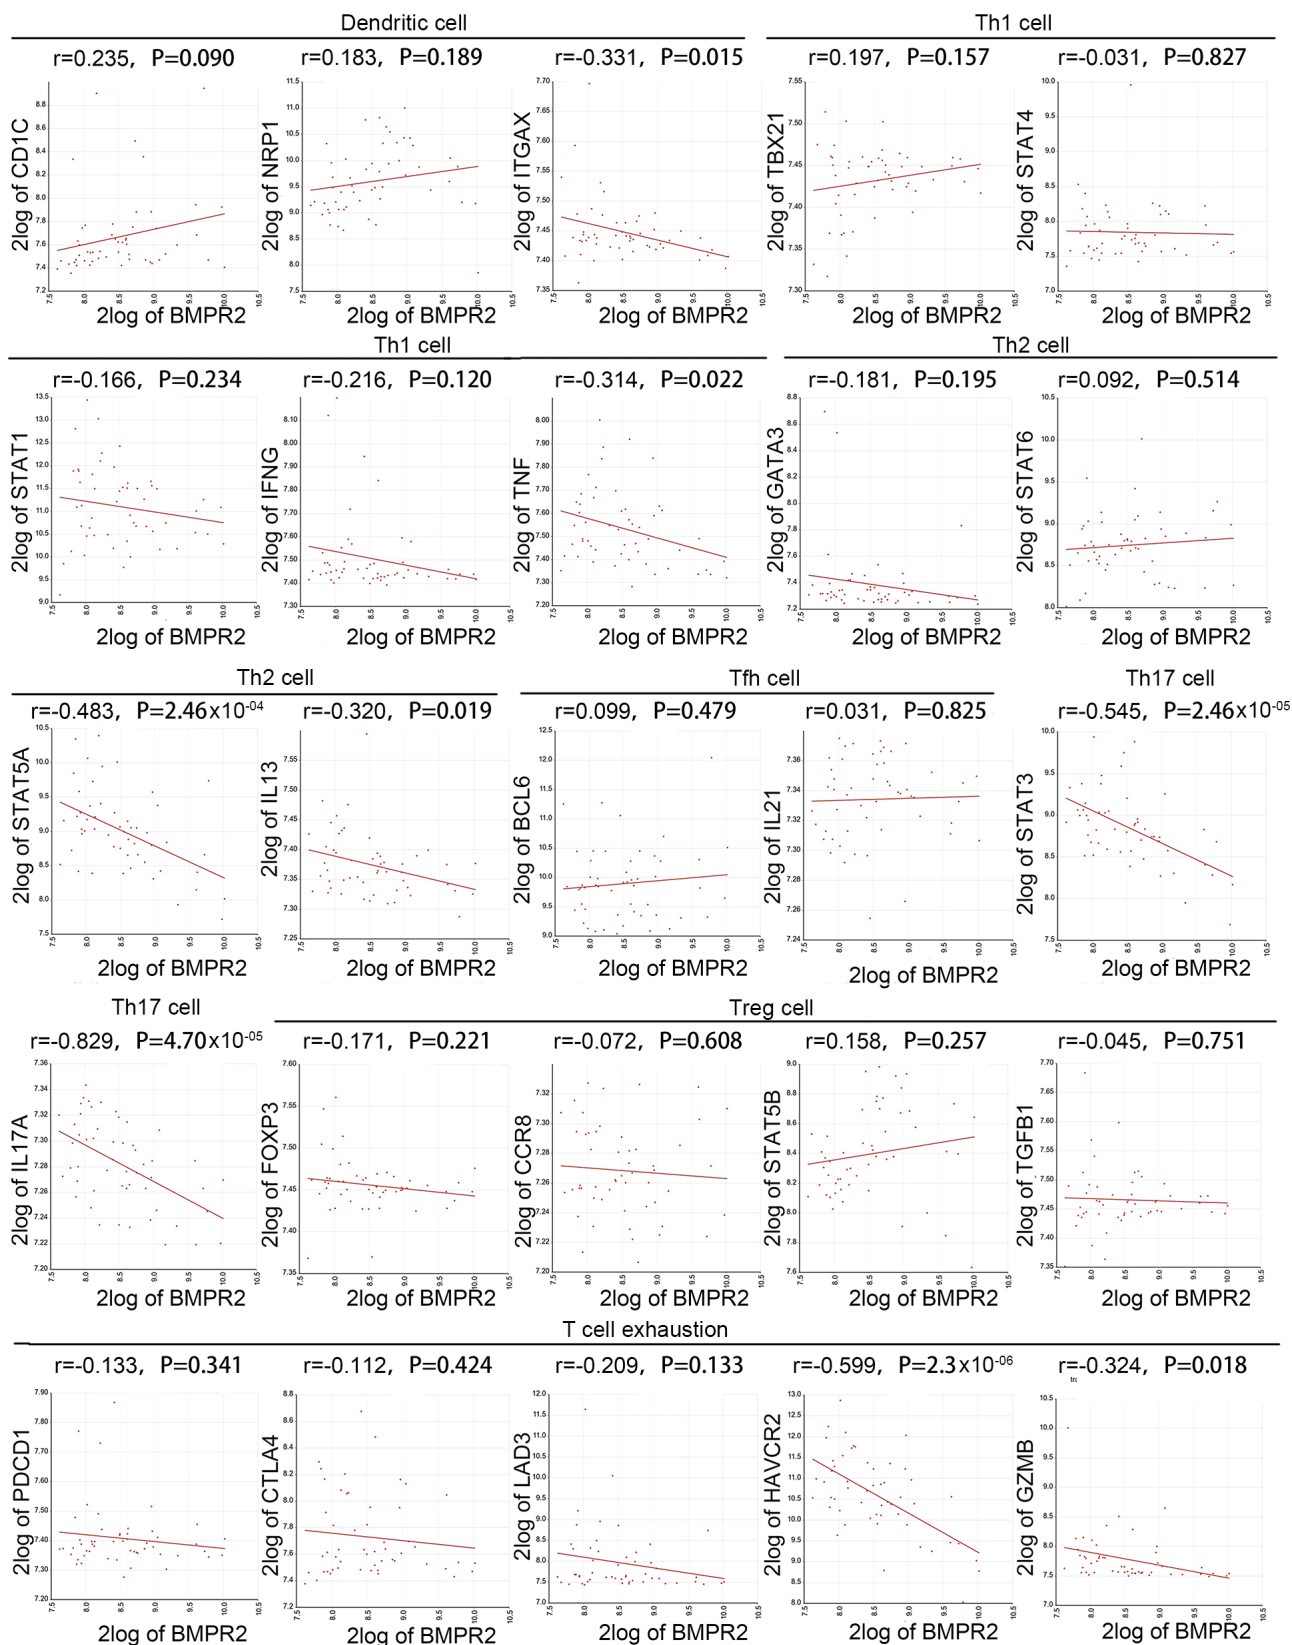

Supplement: Supplementary_Data.pdf [file Supplementary_Data.pdf]
